# Supplementary material
Source: PubMed Central journal article supplement (PMC7292734)
Supplement: EMS85307-supplement-Supplementary_Information.pdf [file EMS85307-supplement-Supplementary_Information.pdf]

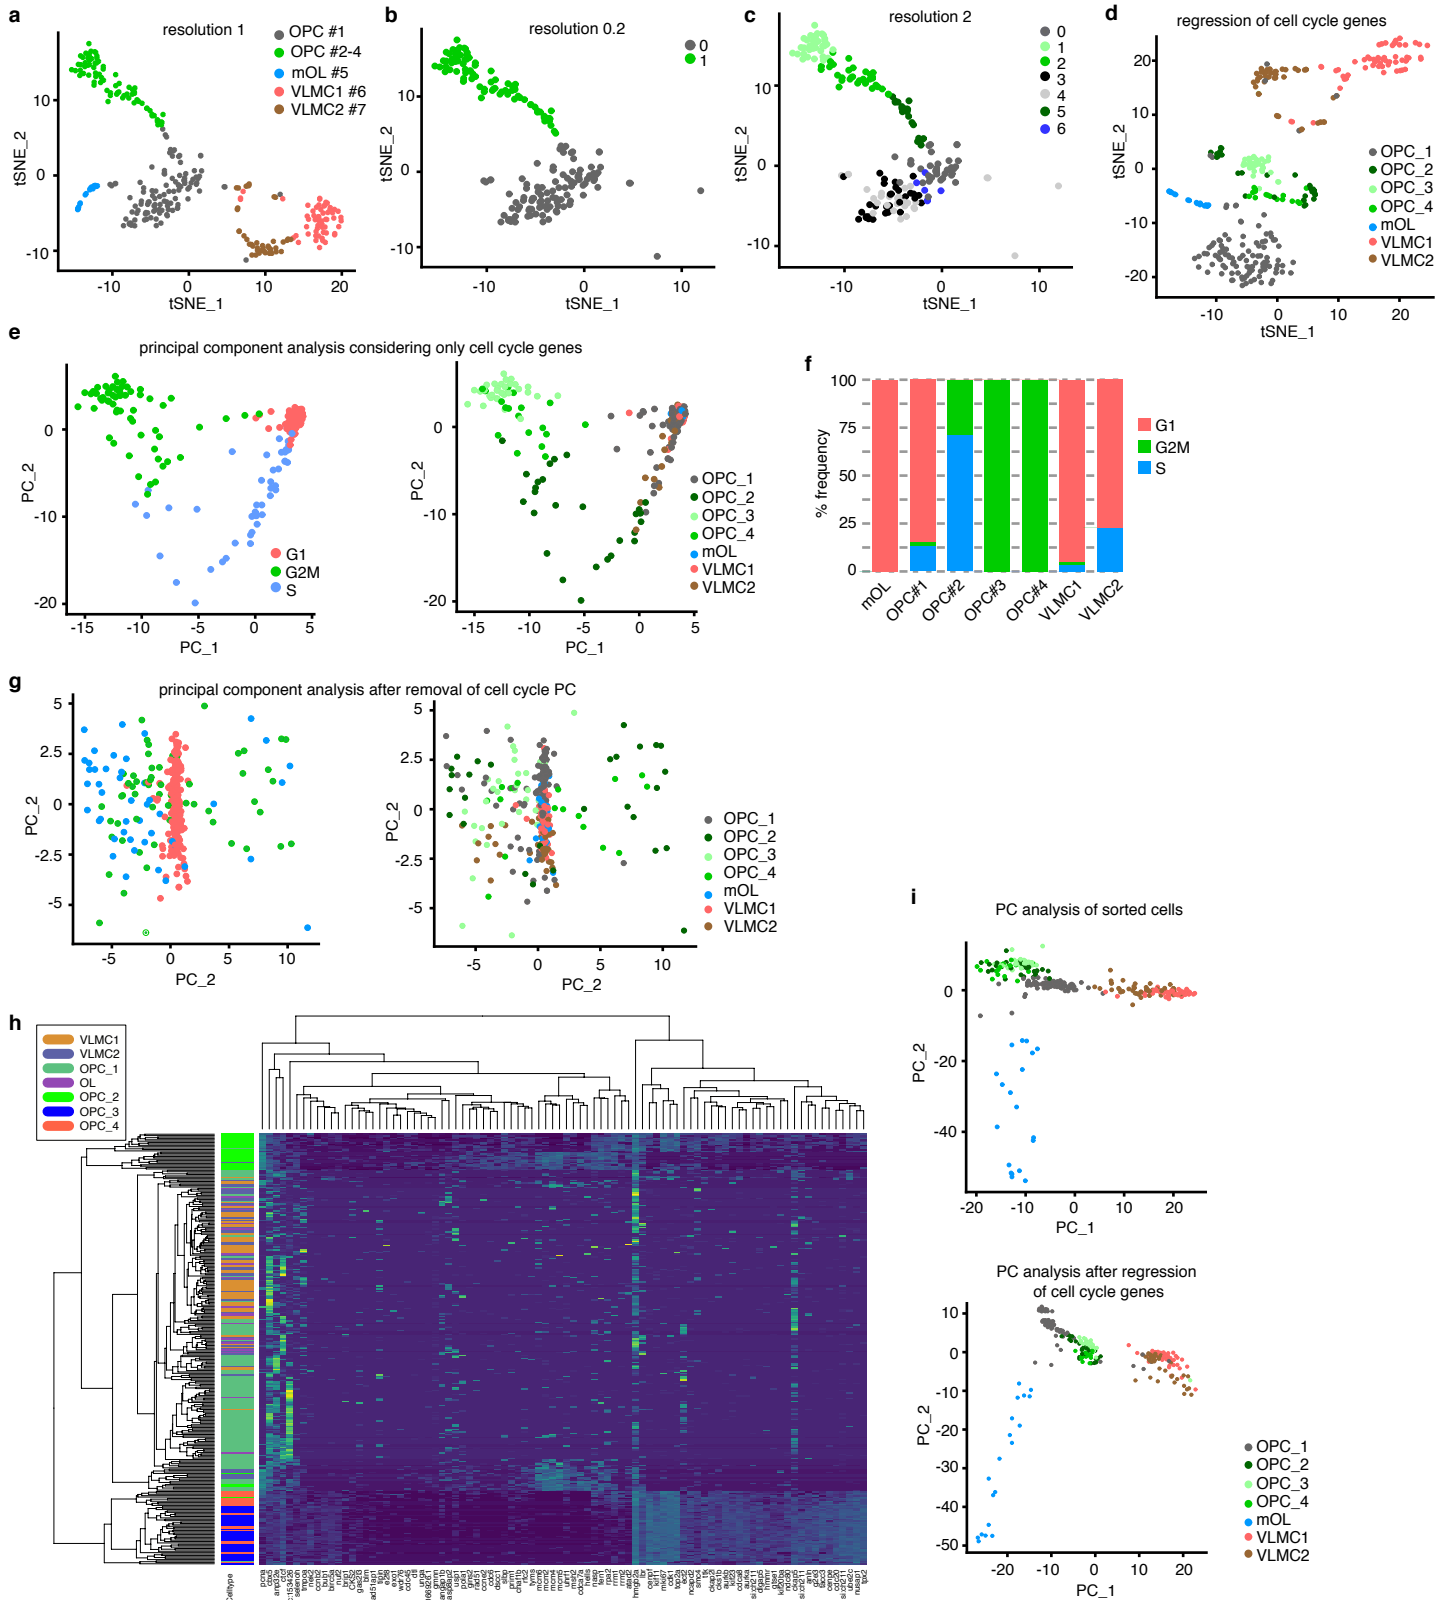

**Supplementary Figure 1: Bioinformatic analysis of sequencing clusters**

- a)** TSNE plot at resolution 1 showing clusters identified from all sequenced olig1:memEYFP cells. Total sample size  $n=310$  cells (OPC #1=110, OPC #2=28, OPC #3=33, OPC #4=18, mOL=19, VLMC1=58, VLMC2=44). This set of cells is the basis for panels a-i.
- b)** TSNE plot at resolution 0.1 of all cells with OPC identity.
- c)** TSNE plot at resolution 2 of all cells with OPC identity.
- d)** TSNE plot at resolution 1 of all cells with oligodendrocyte lineage identity with regression of cell cycle genes.
- e)** Principal component (PC) analysis of olig1:memEYFP-sorted cells considering only cell cycle genes.
- f)** Frequency of markers for cell cycle stages in different clusters of olig1:memEYFP sorted cells.
- g)** Principal component (PC) analysis of olig1:memEYFP-sorted cells after removing the cell cycle PC.
- h)** Heatmap of expression of cell cycle genes considered for regression analysis in the different clusters.
- i)** Principal component analysis of olig1:memEYFP-sorted cells, and with regression of cell cycle genes.

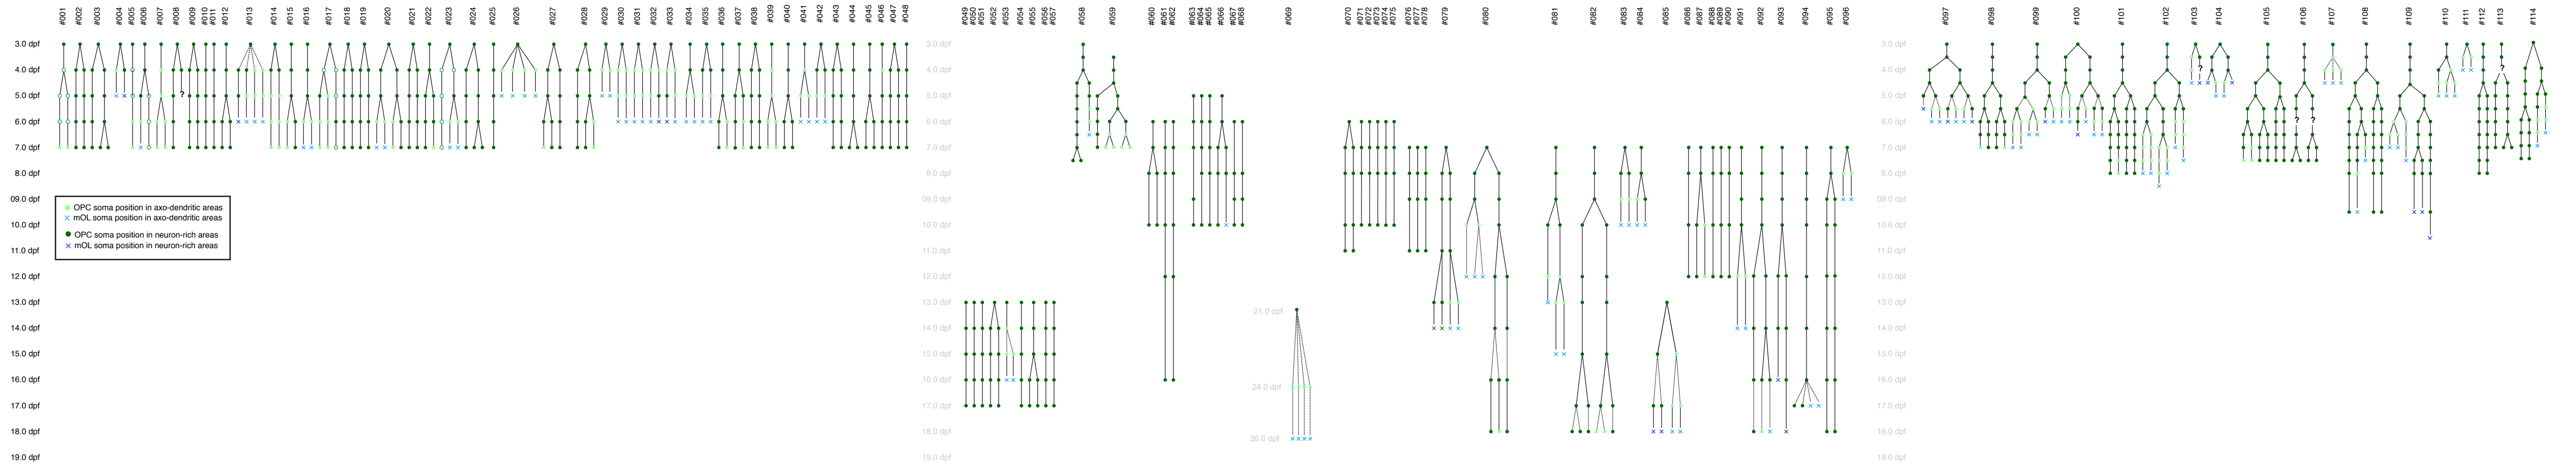

**Supplementary Figure 2: Fate analysis of OPCs with the soma in neuron-rich areas.**

Clonal trees of 114 individually labelled olig1:memEYFP cells positioned with their soma in neuron-rich areas were selected as starting point (from 45 animals in 9 experiments).

**Supplementary Table 1: List of Top 30 Differentially Regulated Genes in OPC clusters #1-#4.**

Total sample size was n=212 cells (#1=110, #2=28, #3=33, #4=18). Differential gene expression was calculated with Seurat FindAllMarkers using the two-tailed Wilcoxon Rank Sum test.

| OPC #1     |           |          |
|------------|-----------|----------|
| gene name  | avg_logFC | p-value  |
| glula      | 1.66      | 3.92E-28 |
| aplnrb     | 1.58      | 1.80E-28 |
| gria1a     | 1.50      | 6.77E-30 |
| slc1a2b    | 1.48      | 3.06E-25 |
| gria2b     | 1.47      | 1.33E-30 |
| atcaya     | 1.42      | 3.76E-29 |
| wscd1b     | 1.41      | 3.57E-24 |
| ncalda     | 1.36      | 2.08E-24 |
| mdkb       | 1.36      | 9.95E-28 |
| gpm6aa     | 1.36      | 2.39E-31 |
| scg2b      | 1.35      | 1.29E-27 |
| slc6a1a    | 1.33      | 1.34E-24 |
| nrxn1a     | 1.32      | 2.07E-24 |
| pcdh2ab9   | 1.31      | 1.81E-25 |
| ckbb       | 1.31      | 2.66E-28 |
| grin1b     | 1.31      | 3.52E-24 |
| tnmem178b  | 1.30      | 5.49E-28 |
| camk2n1a   | 1.30      | 1.62E-27 |
| olig1      | 1.29      | 4.06E-24 |
| nlg3a      | 1.29      | 3.46E-27 |
| cspg5a     | 1.26      | 2.50E-27 |
| sema5a     | 1.25      | 6.44E-28 |
| lrm1       | 1.22      | 2.75E-22 |
| fabp7a     | 1.22      | 3.72E-24 |
| ndrg3a     | 1.21      | 3.51E-25 |
| rassf2a    | 1.21      | 3.74E-26 |
| ttyh3b     | 1.20      | 6.44E-25 |
| spock3     | 1.18      | 1.51E-26 |
| kiaa1549la | 1.18      | 9.75E-24 |
| pygmb      | 1.17      | 1.86E-23 |
| cspg4      | 0.80      | 2.15E-13 |

| OPC #2     |           |          |
|------------|-----------|----------|
| gene name  | avg_logFC | p-value  |
| pcna       | 2.72      | 1.38E-20 |
| rpa1       | 1.99      | 5.62E-22 |
| slc29a2    | 1.96      | 9.20E-17 |
| fen1       | 1.84      | 7.88E-26 |
| rrm2       | 1.83      | 6.03E-19 |
| dnmt1      | 1.78      | 7.24E-19 |
| zgc:110540 | 1.72      | 1.92E-25 |
| stmn1a     | 1.63      | 9.53E-16 |
| mcm5       | 1.60      | 6.46E-09 |
| dnajc9     | 1.60      | 2.35E-18 |
| rrm1       | 1.58      | 2.97E-23 |
| rbbp4      | 1.53      | 3.34E-16 |
| slbp       | 1.52      | 5.10E-31 |
| lig1       | 1.50      | 6.27E-26 |
| rrm2       | 1.47      | 9.29E-14 |
| rpa2       | 1.44      | 3.26E-22 |
| mcm2       | 1.44      | 4.20E-12 |
| chaf1a     | 1.41      | 4.54E-22 |
| nasp       | 1.41      | 2.64E-18 |
| atad2      | 1.40      | 1.41E-21 |
| mcm3       | 1.40      | 4.82E-18 |
| mibp       | 1.33      | 2.78E-10 |
| rfc5       | 1.32      | 1.33E-17 |
| mcm4       | 1.30      | 2.67E-08 |
| sumo3b     | 1.29      | 1.29E-14 |
| tubb2b     | 1.28      | 2.35E-12 |
| asf1ba     | 1.21      | 1.97E-12 |
| dck        | 1.20      | 3.25E-18 |
| atad5a     | 1.20      | 1.05E-20 |
| cdca7a     | 1.20      | 5.14E-11 |

| OPC #3    |           |          |
|-----------|-----------|----------|
| gene name | avg_logFC | p-value  |
| kpna2     | 2.86      | 1.92E-23 |
| cenpf     | 2.62      | 1.50E-27 |
| aspm      | 2.55      | 3.40E-28 |
| tuba8l    | 2.48      | 2.53E-16 |
| kif11     | 2.45      | 1.41E-29 |
| plk1      | 2.36      | 5.53E-27 |
| ccnb1     | 2.23      | 7.20E-31 |
| tpx2      | 2.21      | 2.10E-31 |
| top2a     | 2.17      | 1.68E-25 |
| cdk1      | 2.16      | 1.42E-26 |
| nusap1    | 2.15      | 1.26E-28 |
| ube2c     | 2.10      | 4.63E-29 |
| mki67     | 2.10      | 2.11E-26 |
| tacc3     | 2.08      | 1.44E-34 |
| cdc20     | 2.06      | 8.57E-36 |
| cdc14b    | 2.03      | 6.80E-23 |
| prc1b     | 1.94      | 4.04E-34 |
| kifc1     | 1.92      | 2.26E-29 |
| prc1a     | 1.92      | 1.75E-27 |
| g2e3      | 1.91      | 1.28E-30 |
| ccna2     | 1.86      | 9.00E-25 |
| cenpe     | 1.77      | 3.17E-29 |
| cdca8     | 1.75      | 2.37E-30 |
| ccnf      | 1.74      | 2.36E-31 |
| anln      | 1.73      | 5.74E-31 |
| masl1     | 1.73      | 2.08E-28 |
| mad2l1    | 1.71      | 2.13E-31 |
| ccnb3     | 1.71      | 9.96E-33 |
| rtkn2a    | 1.70      | 2.49E-31 |
| kif2c     | 1.70      | 6.93E-27 |

| OPC #4     |           |          |
|------------|-----------|----------|
| gene name  | avg_logFC | p-value  |
| gpr17      | 1.94      | 8.34E-25 |
| prdm8      | 1.85      | 4.93E-13 |
| draxin     | 1.82      | 4.46E-12 |
| hmg2       | 1.81      | 1.55E-11 |
| hmg2a      | 1.70      | 6.68E-11 |
| lmnb1      | 1.67      | 7.53E-12 |
| cdk1       | 1.60      | 7.18E-13 |
| mki67      | 1.56      | 4.63E-13 |
| top2a      | 1.52      | 5.23E-11 |
| plk1       | 1.50      | 5.03E-12 |
| aspm       | 1.50      | 6.28E-13 |
| hmg1a      | 1.50      | 3.68E-10 |
| lbr        | 1.47      | 3.99E-12 |
| nusap1     | 1.45      | 3.37E-13 |
| ccnb1      | 1.45      | 3.09E-14 |
| sox9b      | 1.44      | 3.71E-10 |
| tuba8l     | 1.44      | 9.82E-11 |
| cenpe      | 1.38      | 4.52E-15 |
| hmg2b      | 1.36      | 9.28E-11 |
| kpna2      | 1.35      | 4.94E-09 |
| zeb2a      | 1.34      | 9.61E-11 |
| tnr        | 1.34      | 9.69E-09 |
| marcksb    | 1.32      | 8.60E-11 |
| cenpf      | 1.31      | 1.47E-11 |
| sox8b      | 1.30      | 8.16E-18 |
| kif11      | 1.30      | 1.19E-12 |
| mycb       | 1.29      | 1.76E-13 |
| tuba8l     | 1.27      | 7.19E-08 |
| wu:fb44b02 | 1.27      | 7.67E-16 |
| tpx2       | 1.27      | 2.35E-13 |
| myrf       | 0.97      | 1.96E-10 |

**Supplementary Table 2: Primers used for molecular cloning**

| Primer name                                                            | Sequence                                                                                                                                                                                                                                            |
|------------------------------------------------------------------------|-----------------------------------------------------------------------------------------------------------------------------------------------------------------------------------------------------------------------------------------------------|
| attB1_GCaMP6m_F<br>attB2R_GCaMP6m_R<br>CAAX-GCaMP6m_R<br>attB2R_CAAX_R | GGGGACAAGTTTGTACAAAAAGCAGGCTGCCACCATGGTTCTCATC<br>GGGGACCACCTTTGTACAGAAAGCTGGGTCTCACTTCGCTGTCACTTTGTA<br>TCAGGAGAGCACACACTTGCAGCTCATGCAGCCGGGGCCACTCTCATCAGGAGGTTTCAGCTTCACTTCGCTGTCACTTTGTAC<br>GGGGACCACCTTTGTACAGAAAGCTGGGTCTCAGGAGAGCACACACTTGC |
| attB1_mCherry_F<br>attB2R_CalEx-R                                      | GGGGACAAGTTTGTACAAAAAGCAGGCTGCCACCATGGTGAGCAAGGGCGAG<br>GGGGACCACCTTTGTACAGAAAGCTGGGTCTCAAGCGACGTCTCCAG                                                                                                                                             |
| attB4_mfap4<br>attB1R_mfap4                                            | GGGGACAAGTTTGTATAGAAAAGTTGGCGTTTCTTGGTACAGCTGG<br>GGGGACTGCTTTTTTGTACAACTTGCTTCTCACTCTCTCTCAAC                                                                                                                                                      |
| attB1_synaptophysin_F<br>attB2R_synaptophysin_nostop_R                 | GGGGACAAGTTTGTACAAAAAGCAGGCTGCCACCATGGATGTTGCC<br>GGGGACCACCTTTGTACAGAAAGCTGGGTCACTTCGTTGGAGAGGATG                                                                                                                                                  |

**Supplementary Table 3: List of Antibodies and Dyes Used**

| Name                             | Organism / type        | Dilution | Company           | Catalog number |
|----------------------------------|------------------------|----------|-------------------|----------------|
| anti-DSRed                       | polyclonal rabbit IgG  | 1:1000   | Takara/Clontech   | 632496         |
| anti-mCherry                     | polyclonal chicken IgY | 1:1000   | Novus Biologicals | NBP2-25158     |
| anti-GFP                         | polyclonal chicken IgY | 1:2000   | Abcam             | ab13970        |
| 3A10                             | monoclonal mouse IgG1  | 1:10     | DHSB              | AB_531874      |
| anti Sox10                       | polyclonal rabbit IgG  | 1:2000   | GeneTex           | GTX128374      |
| anti-acetylated tubulin          | monoclonal mouse IgG2b | 1:2000   | Sigma-Aldrich     | T7451          |
| anti-MAP2                        | monoclonal mouse IgG1  | 1:5000   | Abcam             | Ab11268        |
| anti-gephyrin                    | monoclonal mouse IgG1  | 1:500    | Synaptic systems  | 147 011        |
| anti-chicken Alexa Fluor 488     | polyclonal goat IgG    | 1:1000   | Invitrogen        | A-11039        |
| anti-chicken Alexa Fluor 555     | polyclonal goat IgG    | 1:1000   | Invitrogen        | A-32932        |
| anti-rabbit AlexaFluor 555       | polyclonal goat IgG    | 1:1000   | Invitrogen        | A-21428        |
| anti-rabbit Alexa Fluor 633      | polyclonal goat IgG    | 1:1000   | Invitrogen        | A-21071        |
| anti-mouse Alexa Fluor 633       | polyclonal goat IgG    | 1:1000   | Invitrogen        | A-21052        |
| anti-mouse IgG1 Alexa Fluor 555  | polyclonal goat IgG    | 1:1000   | Invitrogen        | A-21127        |
| anti-mouse IgG2b Alexa Fluor 633 | polyclonal goat IgG    | 1:1000   | Invitrogen        | A-21146        |
| BODIPY 630/650-X                 | n/a                    | 1:200    | Thermo Fisher     | D10000         |
| Opal 650                         | n/a                    | 1:1000   | Perkin Elmer      | FP1496001KT    |
